# Supplementary material
Source: PubMed Central journal article supplement (PMC10502799)
Supplement: supplementary_table1_and_2_bhad272.pdf [file supplementary_table1_and_2_bhad272.pdf]

## Supplementary Tables

**Supplementary Table 1.** Brain regions identified by voxel-wise analysis that show significant activation during differential quantitative processing in the *landmark*, *animal*, and *number* conditions.

| Anatomical areas                     | Cluster size | <i>t</i> | <i>p</i> | MNI coordinates |          |          |
|--------------------------------------|--------------|----------|----------|-----------------|----------|----------|
|                                      |              |          |          | <i>x</i>        | <i>y</i> | <i>z</i> |
| a) <i>Landmark</i> Condition         |              |          |          |                 |          |          |
| <b>Landmark Activation: positive</b> |              |          |          |                 |          |          |
| Precuneus_R                          | 379790       | 17.30    | 0.00000  | 14              | -54      | 14       |
| Frontal_Inf_Orb_R                    | 788          | 10.22    | 0.00000  | 32              | 26       | -8       |
| Frontal_Mid_R                        | 413          | 6.94     | 0.00000  | 40              | 34       | 22       |
| Cerebellum_Crus2_L                   | 155          | 6.82     | 0.00000  | -34             | -70      | -48      |
| Rolandic_Oper_L                      | 117          | 5.68     | 0.00000  | -42             | -24      | 18       |
| Rolandic_Oper_L                      | 63           | 4.54     | 0.00007  | -46             | -2       | 6        |
| Frontal_Sup_Orb_L                    | 171          | 4.16     | 0.00019  | -22             | 54       | -4       |
| Frontal_Sup_Orb_R                    | 36           | 3.93     | 0.00034  | 26              | 54       | -2       |
| Cingulum_Ant_R                       | 14           | 3.76     | 0.00052  | 6               | 6        | 26       |
| Frontal_Inf_Orb_R                    | 20           | 3.42     | 0.00118  | 54              | 18       | 34       |
| <b>Landmark Activation: negative</b> |              |          |          |                 |          |          |
| Cingulum_Ant_R                       | 247350       | 12.72    | 0.00000  | 4               | 36       | -6       |
| Amygdala_L                           | 5859         | 8.43     | 0.00000  | -20             | -4       | -20      |
| Cerebellum_Crus2_R                   | 305          | 8.39     | 0.00000  | 26              | -86      | 38       |
| Cerebellum_Crus2_L                   | 378          | 8.07     | 0.00000  | -28             | -84      | -38      |
| Occipital_Sup_R                      | 580          | 8.03     | 0.00000  | 16              | -88      | 30       |
| Cingulum_Mid_R                       | 358          | 7.19     | 0.00000  | 18              | -48      | 34       |
| Occipital_Mid_L                      | 363          | 6.11     | 0.00000  | -20             | -98      | 16       |
| Frontal_Inf_Orb_R                    | 231          | 8.39     | 0.00000  | 26              | -86      | 38       |
| Fusiform_R                           | 205          | 5.94     | 0.00002  | 50              | 36       | -4       |
| Frontal_Mid_Orb_L                    | 164          | 5.11     | 0.00004  | 30              | -48      | -2       |
| Insula_R                             | 52           | 4.75     | 0.00028  | -24             | 36       | -16      |
| Cingulum_Mid_L                       | 45           | 4.00     | 0.00059  | 36              | 6        | 6        |
| Insula_L                             | 26           | 3.70     | 0.00107  | -20             | -48      | 30       |
| Insula_L                             | 14           | 3.46     | 0.00187  | -24             | 26       | 20       |
| Postcentral_R                        | 14           | 3.23     | 0.00199  | -30             | 2        | 16       |
| Cerebellum_8_L                       | 17           | 3.20     | 0.00213  | 56              | -6       | 30       |
| Cingulum_Ant_R                       | 19           | 3.17     | 0.00000  | -10             | -66      | -44      |
| b) <i>Animal</i> Condition           |              |          |          |                 |          |          |
| <b>Animal Activation: positive</b>   |              |          |          |                 |          |          |

|                 |        |       |         |     |     |     |
|-----------------|--------|-------|---------|-----|-----|-----|
| Postcentral_L   | 124520 | 11.53 | 0.00000 | -44 | -26 | 46  |
| Cerebelum_4_5_R | 3134   | 8.19  | 0.00000 | 16  | -48 | -18 |
| Occipital_Mid_L | 488    | 6.29  | 0.00000 | -40 | -80 | -2  |
| Insula_R        | 359    | 5.41  | 0.00001 | 42  | 14  | 0   |
| Occipital_Inf_R | 181    | 5.17  | 0.00002 | 46  | -80 | -2  |
| Lingual_R       | 61     | 4.34  | 0.00012 | 18  | -72 | -2  |
| Cerebelum_6_L   | 98     | 4.20  | 0.00017 | -32 | -54 | -32 |
| Frontal_Sup_R   | 150    | 3.99  | 0.00029 | 22  | 2   | 48  |
| Parietal_Sup_R  | 96     | 3.78  | 0.00048 | 26  | -58 | 52  |
| Pallidum_R      | 17     | 3.70  | 0.00059 | 18  | -4  | 10  |
| Occipital_Mid_L | 14     | 3.62  | 0.00071 | -28 | -82 | 22  |
| Precentral_R    | 17     | 3.58  | 0.00080 | 54  | 6   | 34  |
| SupraMarginal_R | 36     | 3.57  | 0.00081 | 46  | -26 | 36  |
| Precuneus_R     | 11     | 3.38  | 0.00128 | 34  | -44 | 12  |

**Animal Activation: negative**

|                    |      |       |         |     |      |     |
|--------------------|------|-------|---------|-----|------|-----|
| Frontal_Med_Orb_R  | 8175 | 11.08 | 0.00000 | 4   | 52   | -6  |
| Insula_L           | 4328 | 10.93 | 0.00000 | -40 | 10   | -14 |
| ParaHippocampal_R  | 1125 | 8.56  | 0.00000 | 30  | -34  | -14 |
| Cingulum_Mid_R     | 6711 | 8.43  | 0.00000 | 6   | -18  | 44  |
| Occipital_Mid_L    | 790  | 8.13  | 0.00000 | -16 | -100 | 0   |
| Temporal_Sup_R     | 6826 | 7.65  | 0.00000 | 52  | -14  | -10 |
| Pallidum_L         | 65   | 6.07  | 0.00000 | -6  | -4   | -8  |
| Occipital_Sup_R    | 153  | 5.56  | 0.00001 | 22  | -98  | 10  |
| Cingulum_Mid_R     | 194  | 5.31  | 0.00001 | 12  | -8   | 28  |
| Lingual_R          | 43   | 4.87  | 0.00003 | 8   | -30  | -12 |
| Lingual_R          | 205  | 4.76  | 0.00004 | 18  | -92  | -6  |
| Frontal_Inf_Oper_R | 49   | 4.75  | 0.00004 | 40  | 14   | 18  |
| Cerebelum_Crus2_L  | 262  | 4.57  | 0.00007 | -28 | -82  | -34 |
| Cerebelum_9_R      | 81   | 4.56  | 0.00007 | 6   | -48  | -46 |
| Postcentral_L      | 21   | 4.26  | 0.00015 | -62 | -4   | 26  |
| Frontal_Inf_Orb_R  | 60   | 4.17  | 0.00019 | 48  | 28   | -12 |
| Supp_Motor_Area_L  | 11   | 4.14  | 0.00020 | 0   | 20   | 62  |
| Postcentral_L      | 44   | 4.08  | 0.00023 | -46 | -10  | 36  |
| Cerebelum_10_L     | 15   | 3.67  | 0.00025 | -28 | -24  | 36  |
| Postcentral_L      | 12   | 3.55  | 0.00064 | -20 | 0    | 36  |
| Cingulum_Mid_L     | 37   | 3.48  | 0.00086 | -8  | -46  | -44 |
| Cerebelum_9_L      | 65   | 3.48  | 0.00101 | 22  | -84  | -30 |
| Cerebelum_Crus1_R  | 24   | 3.37  | 0.00101 | 52  | 40   | -2  |
| Frontal_Inf_Tri_R  | 10   | 3.30  | 0.00132 | -4  | -36  | -12 |
| Cerebelum_3_L      | 10   | 3.24  | 0.00156 | 44  | 4    | 26  |

---

c) *Number* Condition

---

**Number Activation: positive**

|                |       |       |         |     |     |     |
|----------------|-------|-------|---------|-----|-----|-----|
| Parietal_Inf_L | 19177 | 12    | 0.00000 | -50 | -26 | 50  |
| Cerebelum_6_R  | 3014  | 10.19 | 0.00000 | 26  | -62 | -26 |

|                   |     |      |         |     |     |     |
|-------------------|-----|------|---------|-----|-----|-----|
| Frontal_Mid_R     | 323 | 8.16 | 0.00000 | 42  | 36  | 20  |
| Cerebelum_6_L     | 771 | 7.18 | 0.00000 | -28 | -68 | -26 |
| Occipital_Inf_R   | 582 | 6.58 | 0.00000 | 44  | -78 | -2  |
| Frontal_Inf_Tri_L | 301 | 6.24 | 0.00000 | -40 | 30  | 20  |
| Caudate_R         | 834 | 5.77 | 0.00000 | 18  | 2   | 12  |
| Calcarine_R       | 654 | 5.32 | 0.00001 | 14  | -70 | 12  |
| Occipital_Inf_L   | 348 | 5.19 | 0.00001 | -38 | -78 | -4  |
| Frontal_Mid_L     | 15  | 3.36 | 0.00135 | -34 | 50  | 8   |

**Number Activation: negative**

|                   |       |       |         |     |     |     |
|-------------------|-------|-------|---------|-----|-----|-----|
| Postcentral_R     | 47319 | 13.93 | 0.00000 | 24  | -40 | 66  |
| Cerebelum_Crus2_R | 1050  | 9.26  | 0.00000 | 24  | -86 | -38 |
| Cerebelum_Crus2_L | 390   | 8.12  | 0.00000 | -26 | -84 | -36 |
| Frontal_Inf_Tri_R | 345   | 5.73  | 0.00000 | 52  | 36  | -2  |
| Thalamus_L        | 77    | 5.32  | 0.00001 | 0   | -6  | -6  |
| Insula_R          | 78    | 5.22  | 0.00001 | 38  | 8   | 8   |
| Thalamus_L        | 15    | 4.49  | 0.00008 | -10 | -30 | 2   |
| Cerebelum_10_L    | 27    | 4.15  | 0.00019 | -12 | -32 | -48 |
| Vermis_1_2        | 58    | 4.00  | 0.00028 | 4   | -40 | -26 |
| Cerebelum_9_R     | 37    | 3.78  | 0.00048 | 4   | -48 | -46 |
| Parietal_Inf_L    | 35    | 3.78  | 0.00049 | -26 | -26 | 34  |
| Cerebelum_10_R    | 13    | 3.70  | 0.00059 | 14  | -32 | -46 |
| Insula_L          | 27    | 3.69  | 0.00060 | -32 | -14 | 16  |
| Postcentral_R     | 16    | 3.57  | 0.00080 | 66  | -8  | 20  |
| Cerebelum_8_L     | 32    | 3.51  | 0.00093 | -6  | -64 | -44 |

---

All clusters survived the threshold of  $p < .005$  with 10 voxel extension and no corrections, to facilitate future meta-analysis (Lieberman and Cunningham, 2009). Anatomical labeling follows AAL (automatic anatomical labeling; Tzourio-Mazoyer et al., 2002). A graphical illustration of these regions is presented in Figure 2C.

**Supplementary Table 2.** Brain regions that show trial-wise modulation effects of differential values in the *landmark*, *animal*, and *number* conditions.

| Anatomical areas                                | Cluster size | <i>t</i> | <i>p</i> | MNI coordinates |     |     |
|-------------------------------------------------|--------------|----------|----------|-----------------|-----|-----|
|                                                 |              |          |          | x               | y   | z   |
| a) <i>Landmark</i> Condition                    |              |          |          |                 |     |     |
| <b>Landmark Parametric Modulation: positive</b> |              |          |          |                 |     |     |
| Temporal_Mid_R                                  | 132          | 6.04     | 0.00000  | 36              | -62 | 4   |
| Cingulum_Ant_L                                  | 145          | 4.76     | 0.00004  | -16             | 44  | -6  |
| SupraMarginal_L                                 | 31           | 4.26     | 0.00015  | -40             | -44 | 24  |
| Postcentral_L                                   | 70           | 3.99     | 0.00028  | -18             | -42 | 68  |
| Temporal_Sup_R                                  | 27           | 3.72     | 0.00056  | 56              | -22 | -2  |
| Cingulum_Ant_R                                  | 29           | 3.68     | 0.00062  | 12              | 34  | -2  |
| Postcentral_L                                   | 20           | 3.54     | 0.00088  | -28             | -36 | 56  |
| Cerebelum_8_L                                   | 15           | 3.45     | 0.00108  | -24             | -64 | -48 |
| Cuneus_R                                        | 59           | 3.43     | 0.00115  | 12              | -86 | 24  |
| Frontal_Sup_Medial_L                            | 11           | 3.30     | 0.00155  | -10             | 58  | 16  |
| Temporal_Sup_L                                  | 11           | 3.29     | 0.00159  | -62             | -24 | 8   |
| Postcentral_R                                   | 11           | 3.22     | 0.00188  | 22              | -48 | 62  |
| Temporal_Sup_R                                  | 11           | 3.22     | 0.00189  | 58              | -2  | -8  |
| Cuneus_R                                        | 12           | 3.15     | 0.00224  | 4               | -80 | 36  |
| Temporal_Mid_L                                  | 12           | 3.11     | 0.00248  | -36             | -46 | 12  |
| <b>Landmark Parametric Modulation: negative</b> |              |          |          |                 |     |     |
| Angular_R                                       | 434          | 7.26     | 0.00000  | 42              | -66 | 34  |
| Thalamus_L                                      | 159          | 6.28     | 0.00000  | -6              | -20 | 16  |
| Cerebelum_9_L                                   | 122          | 5.97     | 0.00000  | -14             | -52 | -48 |
| Precuneus_R                                     | 993          | 5.75     | 0.00000  | 14              | -56 | 20  |
| Frontal_Mid_L                                   | 378          | 5.35     | 0.00001  | -28             | 14  | 52  |
| Fusiform_R                                      | 109          | 5.10     | 0.00002  | 24              | -38 | -16 |
| Thalamus_L                                      | 89           | 4.99     | 0.00002  | -6              | -26 | -8  |
| Supp_Motor_Area_L                               | 296          | 4.90     | 0.00003  | -4              | 14  | 56  |
| ParaHippocampal_L                               | 373          | 4.90     | 0.00003  | -30             | -42 | -8  |
| Occipital_Mid_L                                 | 107          | 4.82     | 0.00004  | -40             | -78 | 32  |
| Cingulum_Mid_R                                  | 97           | 4.75     | 0.00004  | 6               | -40 | 46  |
| Frontal_Mid_R                                   | 270          | 4.68     | 0.00005  | 26              | 16  | 48  |
| Cerebelum_3_R                                   | 81           | 4.52     | 0.00008  | 4               | -24 | -16 |
| Precuneus_R                                     | 257          | 4.26     | 0.00015  | 10              | -66 | 52  |
| Cerebelum_9_R                                   | 58           | 4.22     | 0.00016  | 10              | -50 | -34 |
| Frontal_Mid_L                                   | 75           | 4.11     | 0.00022  | -26             | 28  | 40  |
| Frontal_Sup_R                                   | 27           | 4.07     | 0.00023  | 22              | 8   | 66  |
| Cerebelum_9_R                                   | 56           | 4.03     | 0.00026  | 8               | -58 | -48 |
| Pallidum_R                                      | 196          | 3.95     | 0.00032  | 14              | 6   | 2   |
| Insula_L                                        | 53           | 3.91     | 0.00035  | -30             | 22  | -10 |

|                    |    |      |         |     |     |     |
|--------------------|----|------|---------|-----|-----|-----|
| Cingulum_Mid_R     | 40 | 3.89 | 0.00037 | 8   | -26 | 24  |
| Cerebellum_Crus1_R | 29 | 3.85 | 0.00041 | 10  | -72 | -28 |
| Hippocampus_L      | 50 | 3.79 | 0.00048 | -8  | -10 | -10 |
| Frontal_Inf_Orb_L  | 17 | 3.78 | 0.00048 | -40 | 36  | -16 |
| Frontal_Inf_Oper_R | 41 | 3.70 | 0.00059 | 34  | 8   | 34  |
| Cerebellum_10_L    | 15 | 3.70 | 0.00059 | -2  | -30 | -46 |
| Cerebellum_3_R     | 24 | 3.58 | 0.00080 | 16  | -26 | -20 |
| Precentral_L       | 24 | 3.48 | 0.00102 | -36 | 2   | 32  |
| Cerebellum_6_L     | 17 | 3.37 | 0.00131 | -32 | -52 | -36 |
| Precuneus_R        | 10 | 3.37 | 0.00132 | 14  | -52 | 52  |
| Frontal_Inf_Tri_L  | 90 | 3.35 | 0.00138 | -36 | 26  | 30  |
| Insula_R           | 34 | 3.34 | 0.00143 | 32  | 26  | 0   |
| Parietal_Inf_L     | 19 | 3.33 | 0.00147 | -34 | -46 | 46  |
| Pallidum_L         | 22 | 3.32 | 0.00150 | -10 | 8   | 0   |
| ParaHippocampal_L  | 16 | 3.20 | 0.00197 | -16 | -16 | -22 |

---

b) Animal Condition

---

**Animal Parametric modulation: positive**

|                   |      |      |         |     |     |     |
|-------------------|------|------|---------|-----|-----|-----|
| Occipital_Sup_R   | 1231 | 5.72 | 0.00000 | 22  | -90 | 24  |
| Rolandic_Oper_L   | 97   | 4.75 | 0.00004 | -34 | -40 | 22  |
| Temporal_Sup_L    | 217  | 4.62 | 0.00006 | -56 | -32 | 22  |
| Lingual_L         | 71   | 4.54 | 0.00007 | -36 | -52 | 2   |
| Cingulum_Mid_R    | 299  | 4.53 | 0.00008 | 10  | -22 | 36  |
| Frontal_Mid_L     | 141  | 4.48 | 0.00009 | -36 | 40  | 22  |
| Fusiform_R        | 16   | 4.26 | 0.00015 | 42  | -34 | -16 |
| Lingual_R         | 64   | 4.20 | 0.00017 | 16  | -82 | -8  |
| Temporal_Mid_R    | 112  | 4.18 | 0.00018 | 54  | -58 | 2   |
| Fusiform_L        | 62   | 4.16 | 0.00019 | -28 | -44 | -10 |
| Caudate_L         | 34   | 4.12 | 0.00021 | -14 | 22  | 10  |
| Fusiform_R        | 112  | 4.10 | 0.00022 | 28  | -62 | -16 |
| Precuneus_L       | 97   | 4.10 | 0.00022 | -8  | -70 | 34  |
| Cingulum_Mid_L    | 39   | 3.96 | 0.00031 | -14 | -32 | 50  |
| Fusiform_R        | 39   | 3.94 | 0.00033 | 30  | -42 | -10 |
| SupraMarginal_R   | 93   | 3.93 | 0.00033 | 62  | -22 | 24  |
| Frontal_Med_Orb_R | 50   | 3.91 | 0.00035 | 8   | 52  | -8  |
| Cingulum_Ant_L    | 415  | 3.82 | 0.00044 | -14 | 48  | -8  |
| Insula_L          | 49   | 3.79 | 0.00047 | -38 | 4   | 10  |
| Fusiform_L        | 194  | 3.78 | 0.00048 | -28 | -68 | -10 |
| Precuneus_L       | 29   | 3.69 | 0.00061 | -12 | -50 | 56  |
| Frontal_Inf_Orb_L | 25   | 3.65 | 0.00067 | -24 | 36  | -10 |
| Caudate_R         | 16   | 3.54 | 0.00088 | 18  | 24  | 10  |
| Insula_R          | 16   | 3.42 | 0.00116 | 42  | 2   | 10  |
| Occipital_Mid_L   | 30   | 3.39 | 0.00125 | -42 | -82 | 10  |
| Precentral_R      | 10   | 3.24 | 0.00182 | 38  | -26 | 64  |

**Animal Parametric modulation: negative**

|                   |      |      |         |     |    |     |
|-------------------|------|------|---------|-----|----|-----|
| Frontal_Inf_Orb_L | 2673 | 7.10 | 0.00000 | -44 | 40 | -18 |
|-------------------|------|------|---------|-----|----|-----|

|                      |      |      |         |     |     |     |
|----------------------|------|------|---------|-----|-----|-----|
| Frontal_Sup_Medial_L | 1503 | 6.38 | 0.00000 | -6  | 38  | 40  |
| Occipital_Sup_R      | 511  | 6.03 | 0.00000 | 30  | -76 | 46  |
| Frontal_Inf_Oper_R   | 1092 | 5.94 | 0.00000 | 44  | 12  | 26  |
| Temporal_Inf_L       | 249  | 5.87 | 0.00000 | -50 | -54 | -12 |
| Parietal_Inf_R       | 573  | 5.85 | 0.00000 | 48  | -44 | 48  |
| Parietal_Sup_L       | 264  | 5.08 | 0.00002 | -24 | -66 | 40  |
| Cerebelum_Crus1_L    | 254  | 4.50 | 0.00008 | -42 | -70 | -36 |
| Thalamus_R           | 17   | 4.45 | 0.00009 | 6   | -12 | 4   |
| Thalamus_L           | 26   | 4.40 | 0.00010 | -18 | -12 | 14  |
| Cerebelum_Crus1_R    | 129  | 4.27 | 0.00014 | 32  | -60 | -38 |
| Frontal_Sup_L        | 36   | 4.13 | 0.00020 | -18 | 16  | 58  |
| Cerebelum_Crus2_R    | 374  | 4.09 | 0.00023 | 8   | -82 | -28 |
| Thalamus_L           | 74   | 4.07 | 0.00024 | -4  | -26 | 0   |
| Frontal_Mid_L        | 58   | 4.06 | 0.00024 | -32 | 16  | 54  |
| Parietal_Inf_L       | 113  | 4.06 | 0.00025 | -48 | -40 | 46  |
| Thalamus_R           | 59   | 3.91 | 0.00035 | 12  | -28 | -2  |
| Frontal_Mid_L        | 25   | 3.81 | 0.00045 | -36 | 4   | 60  |
| Frontal_Inf_Orb_R    | 10   | 3.78 | 0.00048 | 40  | 38  | -18 |
| Precuneus_L          | 31   | 3.71 | 0.00057 | -2  | -60 | 42  |
| Thalamus_R           | 13   | 3.58 | 0.00079 | 6   | -16 | -10 |
| Frontal_Sup_L        | 16   | 3.57 | 0.00081 | -16 | 46  | 30  |
| Temporal_Inf_R       | 20   | 3.55 | 0.00085 | 50  | -52 | -12 |
| Cerebelum_9_L        | 35   | 3.45 | 0.00109 | -2  | -52 | -44 |
| Fusiform_R           | 27   | 3.45 | 0.00110 | 42  | -50 | -20 |
| Temporal_Inf_L       | 10   | 3.44 | 0.00111 | -42 | -20 | -24 |
| Frontal_Mid_L        | 32   | 3.42 | 0.00116 | -30 | 20  | 44  |
| Cingulum_Ant_L       | 18   | 3.33 | 0.00145 | -4  | 2   | 28  |
| Parietal_Sup_R       | 12   | 3.29 | 0.00161 | 34  | -54 | 58  |

---

c) Number condition

---

**Number Parametric modulation: positive**

|                   |      |      |         |     |     |     |
|-------------------|------|------|---------|-----|-----|-----|
| Rolandic_Oper_R   | 1653 | 6.69 | 0.00000 | 40  | -6  | 16  |
| Rolandic_Oper_L   | 3645 | 6.09 | 0.00000 | -44 | -30 | 22  |
| Insula_L          | 83   | 5.40 | 0.00001 | -32 | 2   | 12  |
| ParaHippocampal_R | 44   | 5.34 | 0.00001 | 24  | -32 | -14 |
| Precuneus_R       | 197  | 5.11 | 0.00002 | 22  | -46 | 12  |
| Insula_R          | 42   | 5.02 | 0.00002 | 36  | 8   | 12  |
| Hippocampus_R     | 62   | 4.78 | 0.00004 | 36  | -34 | -8  |
| Cingulum_Ant_R    | 305  | 4.77 | 0.00004 | 4   | 30  | -4  |
| Hippocampus_L     | 46   | 4.72 | 0.00005 | -22 | -10 | -22 |
| Frontal_Med_Orb_R | 638  | 4.65 | 0.00006 | 4   | 54  | -6  |
| Frontal_Inf_Orb_L | 191  | 4.65 | 0.00006 | -36 | 32  | -16 |
| Temporal_Mid_R    | 100  | 4.52 | 0.00008 | 60  | -6  | -20 |
| Temporal_Mid_L    | 251  | 4.30 | 0.00013 | -60 | -16 | -20 |
| Calcarine_R       | 40   | 4.22 | 0.00016 | 36  | -50 | 4   |
| Temporal_Sup_R    | 92   | 4.17 | 0.00018 | 52  | -54 | 22  |

|                      |     |      |         |     |     |     |
|----------------------|-----|------|---------|-----|-----|-----|
| Temporal_Mid_R       | 69  | 4.12 | 0.00021 | 50  | -62 | 8   |
| Temporal_Mid_L       | 228 | 4.10 | 0.00022 | -56 | -58 | 18  |
| Fusiform_R           | 103 | 4.07 | 0.00024 | 38  | -18 | -24 |
| Temporal_Mid_L       | 175 | 4.02 | 0.00027 | -46 | -44 | 0   |
| Lingual_R            | 217 | 3.90 | 0.00036 | 18  | -80 | -4  |
| Paracentral_Lobule_R | 145 | 3.85 | 0.00041 | 12  | -22 | 70  |
| Insula_R             | 32  | 3.84 | 0.00042 | 38  | -10 | 4   |
| Frontal_Inf_Oper_R   | 43  | 3.83 | 0.00043 | 24  | 2   | 30  |
| Cingulum_Mid_L       | 93  | 3.57 | 0.00081 | -4  | 4   | 38  |
| Cingulum_Mid_R       | 23  | 3.51 | 0.00094 | 8   | -22 | 32  |
| Frontal_Sup_Medial_L | 29  | 3.41 | 0.00119 | -8  | 60  | 24  |
| Cingulum_Mid_R       | 64  | 3.35 | 0.00139 | 16  | -24 | 48  |
| ParaHippocampal_L    | 25  | 3.29 | 0.00158 | -22 | -40 | -10 |
| Precentral_R         | 11  | 3.08 | 0.00267 | 38  | -10 | 36  |
| Postcentral_L        | 12  | 3.06 | 0.00274 | -22 | -40 | 66  |
| Rolandic_Oper_R      | 18  | 3.01 | 0.00315 | 58  | 2   | 8   |

**Number Parametric modulation: negative**

|                    |      |      |         |     |     |     |
|--------------------|------|------|---------|-----|-----|-----|
| Supp_Motor_Area_R  | 2180 | 8.13 | 0.00000 | 6   | 20  | 52  |
| Precentral_L       | 888  | 5.19 | 0.00001 | -42 | 8   | 30  |
| Vermis_9           | 157  | 5.12 | 0.00002 | 0   | -52 | -36 |
| Insula_L           | 321  | 5.06 | 0.00002 | -28 | 22  | -6  |
| Parietal_Sup_L     | 1114 | 5.02 | 0.00002 | -26 | -62 | 48  |
| Insula_R           | 404  | 4.84 | 0.00004 | 36  | 20  | -8  |
| Occipital_Mid_R    | 1089 | 4.71 | 0.00005 | 34  | -62 | 30  |
| Cerebellum_Crus1_L | 138  | 4.67 | 0.00005 | -10 | -78 | -26 |
| Precentral_R       | 389  | 4.60 | 0.00006 | 46  | 8   | 30  |
| Pallidum_R         | 390  | 4.56 | 0.00007 | 14  | 4   | -2  |
| Frontal_Inf_Tri_R  | 242  | 4.54 | 0.00007 | 44  | 30  | 18  |
| Pallidum_L         | 117  | 4.41 | 0.00010 | -12 | 4   | 2   |
| Cerebellum_6_L     | 138  | 4.38 | 0.00011 | -30 | -62 | -30 |
| Cerebellum_8_R     | 19   | 4.33 | 0.00012 | 30  | -72 | -50 |
| Frontal_Mid_L      | 324  | 4.33 | 0.00012 | -26 | 10  | 54  |
| Thalamus_L         | 103  | 4.30 | 0.00013 | -8  | -10 | 2   |
| Cerebellum_10_L    | 30   | 4.22 | 0.00016 | -18 | -36 | -42 |
| Cerebellum_6_R     | 103  | 4.15 | 0.00019 | 8   | -76 | -20 |
| Vermis_10          | 46   | 4.04 | 0.00025 | 0   | -34 | -44 |
| Cerebellum_3_R     | 96   | 3.99 | 0.00029 | 8   | -28 | -14 |
| Temporal_Inf_L     | 86   | 3.89 | 0.00037 | -44 | -66 | -10 |
| Occipital_Inf_L    | 25   | 3.88 | 0.00038 | -38 | -86 | -8  |
| Cerebellum_7b_L    | 15   | 3.67 | 0.00063 | -28 | -70 | -48 |
| Vermis_3           | 11   | 3.44 | 0.00112 | -2  | -32 | -6  |
| Cerebellum_6_R     | 27   | 3.41 | 0.00121 | 34  | -70 | -26 |

---

Note: All clusters survived the threshold of  $p < .005$  with 10 voxel extension and no corrections, to facilitate future meta-analysis (Lieberman and Cunningham, 2009). Anatomical labeling follows AAL (automatic anatomical labeling; Tzourio-Mazoyer et al., 2002). A graphical illustration of these regions is presented in Figure 3C.
